# Supplementary material
Source: publisher figshare collection journal article supplement (https://diabetesjournals.figshare.com/articles/dataset/_/16692190)

**Figure 1. Adjusted rates of hypoglycemia and hyperglycemia crises among patients with diabetes and ESKD on dialysis in the U.S.: 2013-2017.** Rates are adjusted for year, patient age, sex, race/ethnicity, U.S. region, mode of dialysis, comorbidities, and anti-diabetic medications.

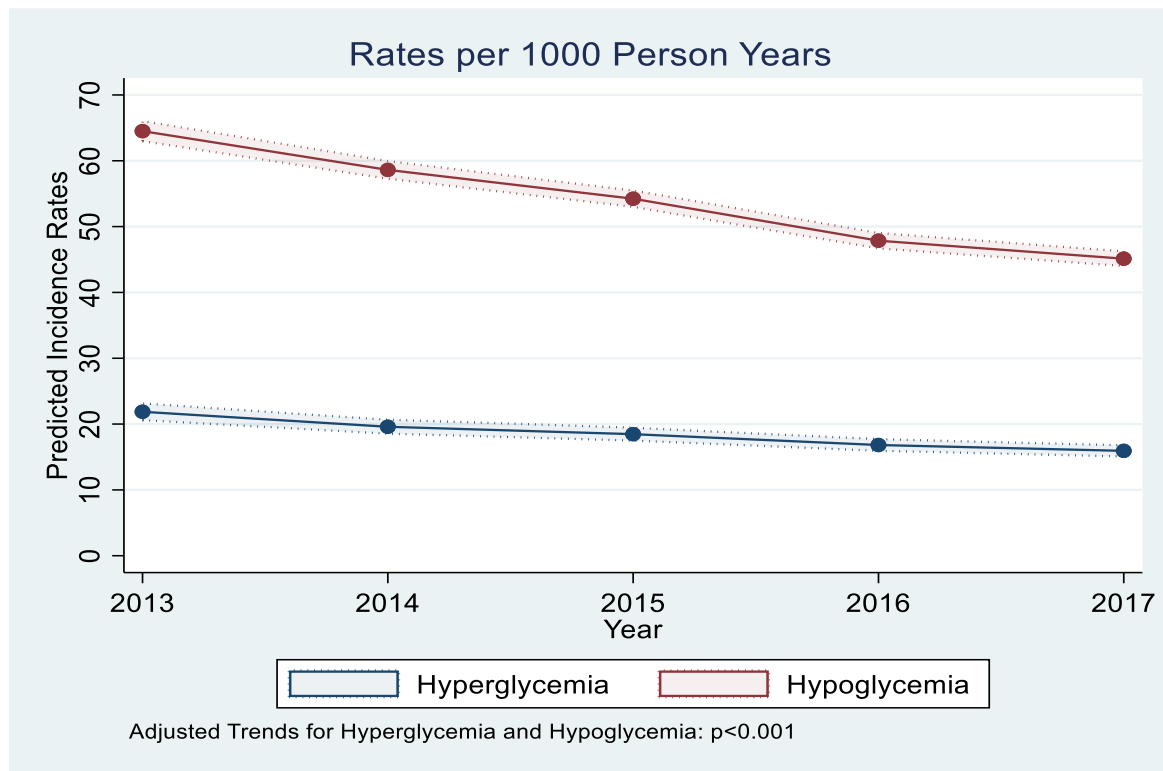

Supplement: Supplementary file 1 [file 1]
