# Supplementary material
Source: publisher figshare collection journal article supplement (https://diabetesjournals.figshare.com/articles/dataset/_/16692190)
Supplement: Supplementary file 2 [file 1]

## Online-Only Supplemental Material

e. Figure 1. Cohort Creation

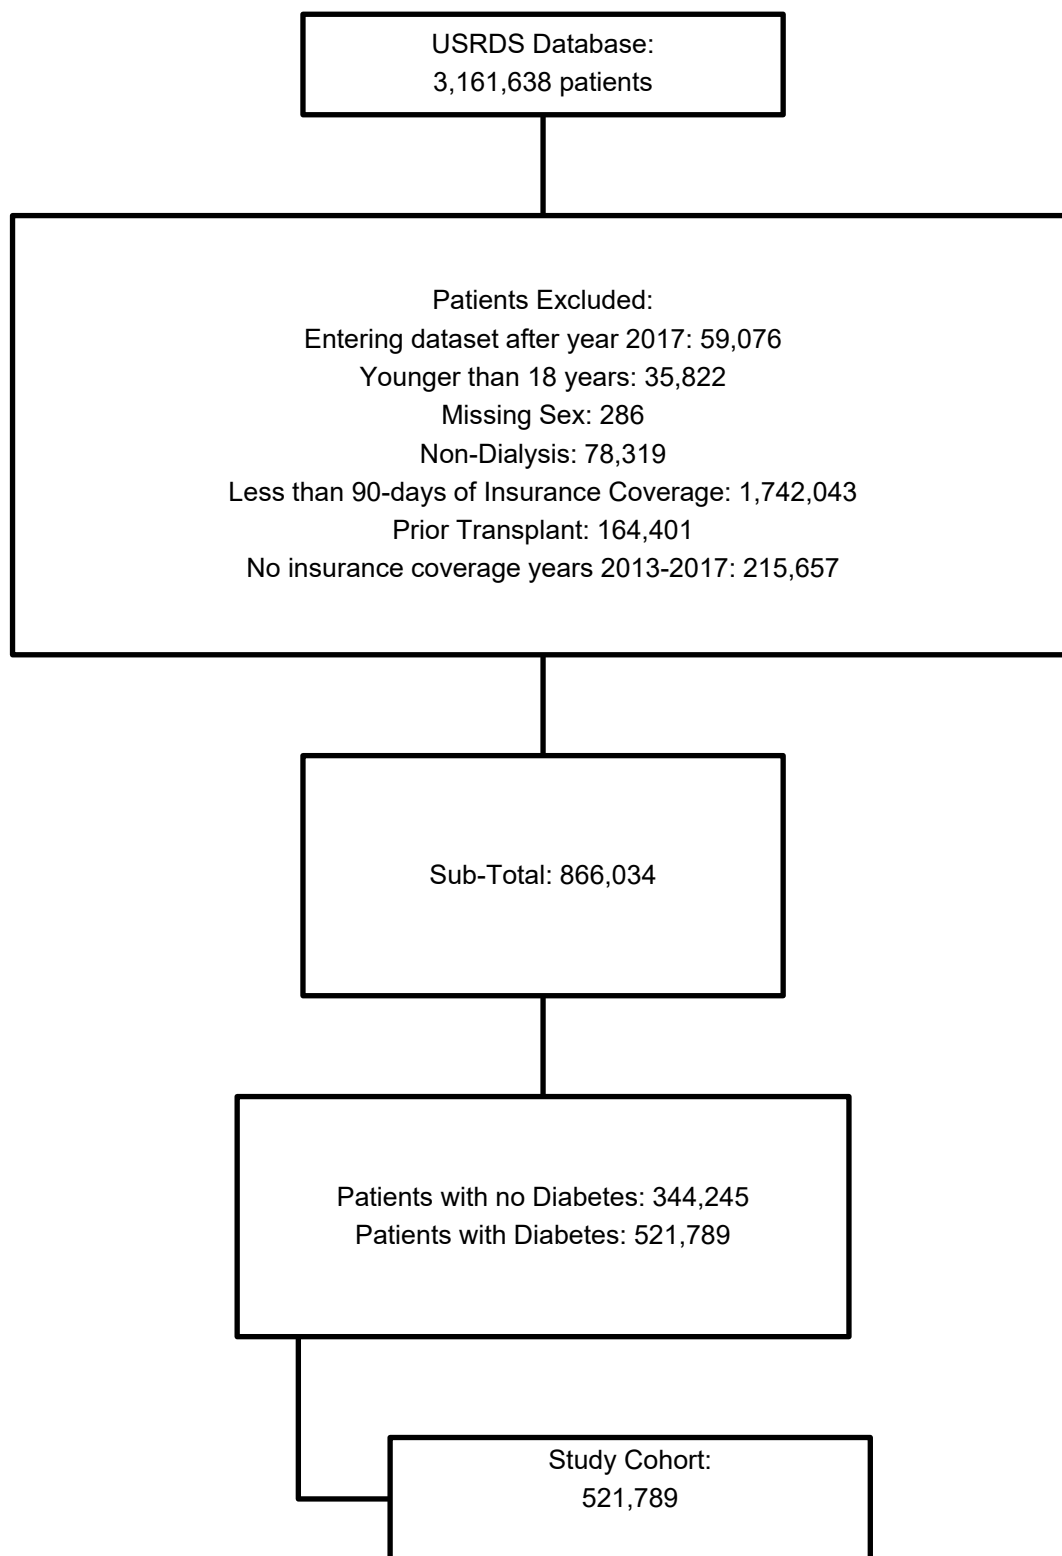

**eTable 1. Code sets for included diabetes crises.**

| <b>Comorbidity</b>   | <b>ICD-9 Codes</b>                                                                                                                                                              | <b>ICD-10 codes</b>                                                                                                                                                                                                                                | <b>Included code types</b>                                        |
|----------------------|---------------------------------------------------------------------------------------------------------------------------------------------------------------------------------|----------------------------------------------------------------------------------------------------------------------------------------------------------------------------------------------------------------------------------------------------|-------------------------------------------------------------------|
| <b>Hyperglycemia</b> | 250.10, 250.11, 250.12, 250.13<br>250.20, 250.21, 250.22, 250.23                                                                                                                | E10.10, E10.11, E11.10, E11.11,<br>E13.10, E13.11<br>E11.00, E11.01, E13.00, E13.01                                                                                                                                                                | Hospital and ED<br>claims<br>Codes in 1 <sup>st</sup><br>position |
| <b>Hypoglycemia</b>  | 251.0, 251.1, 251.2, 962.3,<br>250.8x (for 250.8x: if no<br>concurrent 259.8, 272.7,<br>681.xx, 682.xx, 686.9x,<br>707.1x-707.2x, 707.8, 707.9,<br>709.3, 730.0x-730.2x, 731.8) | E10.641, E10.649, E11.641,<br>E11.649, E13.641, E13.649, E16.0,<br>E16.1, E16.2, T38.3X1A,<br>T38.3X1D, T38.3X1S, T38.3X2A,<br>T38.3X2D, T38.3X2S, T38.3X3A,<br>T38.3X3D, T38.3X3S, T38.3X4A,<br>T383X4D, T38.3X4S, T38.3X5A,<br>T383X5D, T38.3X5S | Hospital and ED<br>claims<br>Codes in 1 <sup>st</sup><br>position |

Abbreviations: ED, emergency department;
